# Supplementary material for: 3D printable adhesive elastomers with dynamic covalent bond rearrangement
Source: Royal Society of Chemistry journal article supplement (doi:10.1039/d3sm00394a), 2023-01-01
Supplement: d3sm00394a6.pdf [file d3sm00394a6.pdf]

## Supporting Information: 3D printable adhesive elastomers with dynamic covalent bond rearrangement

Shiwanka V. Wanasinghe<sup>1,+</sup>, Brent Johnson<sup>2,+</sup>, Rebekah Revadelo<sup>2</sup>, Grant Eifert<sup>2</sup>, Allyson Cox<sup>3</sup>, Joseph Beckett<sup>5</sup>, Timothy Osborn<sup>3</sup>, Carl Thrasher<sup>4,\*</sup>, Robert Lowe<sup>2,\*</sup>, and Dominik Konkolewicz<sup>1,\*</sup>

<sup>1</sup>Department of Chemistry and Biochemistry, Miami University, Oxford, OH 45056

<sup>2</sup>Department of Mechanical and Aerospace Engineering, University of Dayton, Dayton, OH 45469

<sup>3</sup>Additive Manufacturing Technology Development Group, University of Dayton Research Institute, Dayton, OH 45469

<sup>4</sup>Department of Materials Science and Engineering, Massachusetts Institute of Technology, Cambridge, MA 02142

<sup>5</sup>Department of Mechanical Engineering, University of Michigan, Ann Arbor, MI 48109

+Contributed Equally

\*Corresponding authors

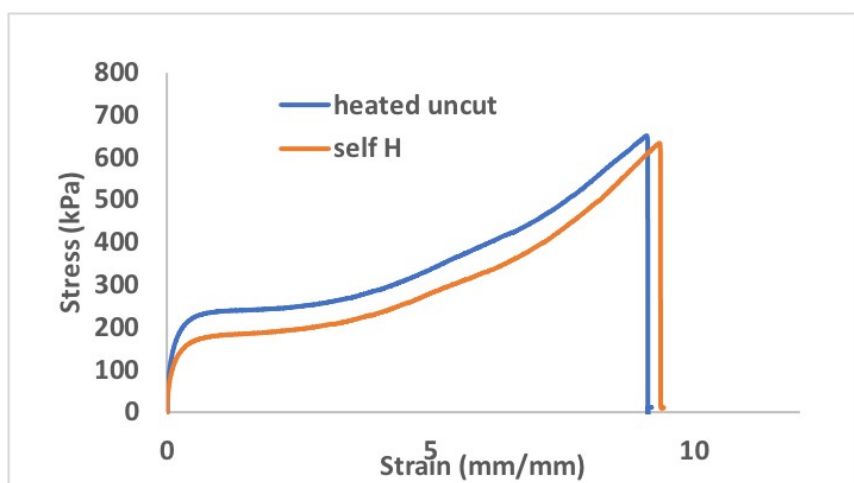

**Figure S1:** Self-Healing of HEA:BA (100:0) with TMSDA: EDDT (1:1) (Formulation 7)

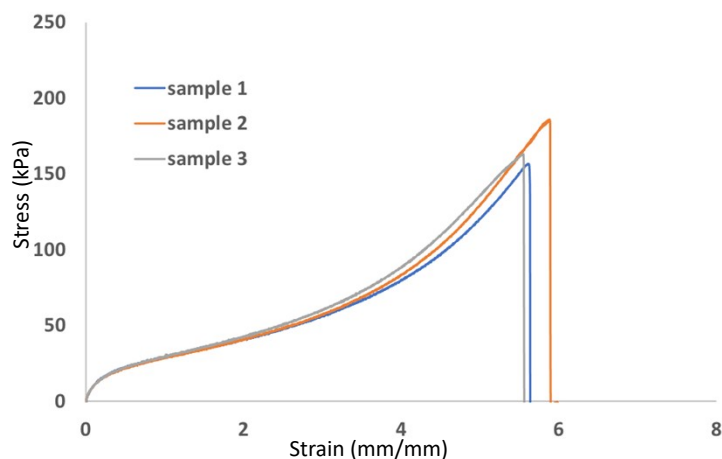

**Figure S2:** Stress-strain curves for the materials with HEA:BA (100:0) with TMSDA: EDDT (1:0.75) (Formulation 6).

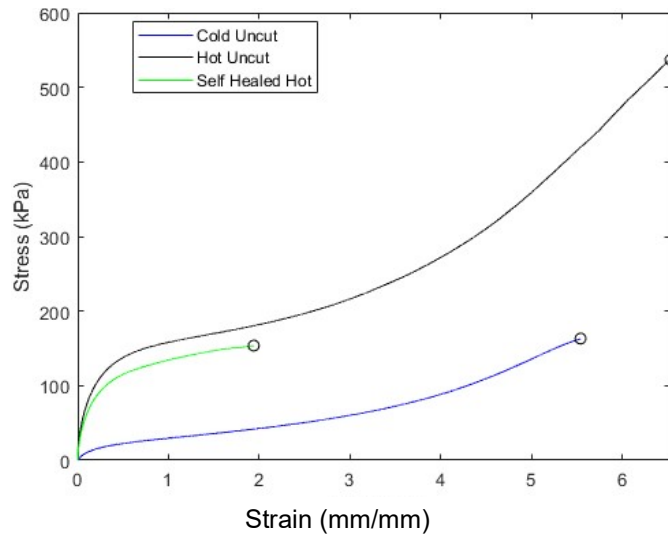

**Figure S3:** Self-Healing curves of HEA:BA (100:0) with TMSDA: EDDT (1:0.75) (Formulation 6)

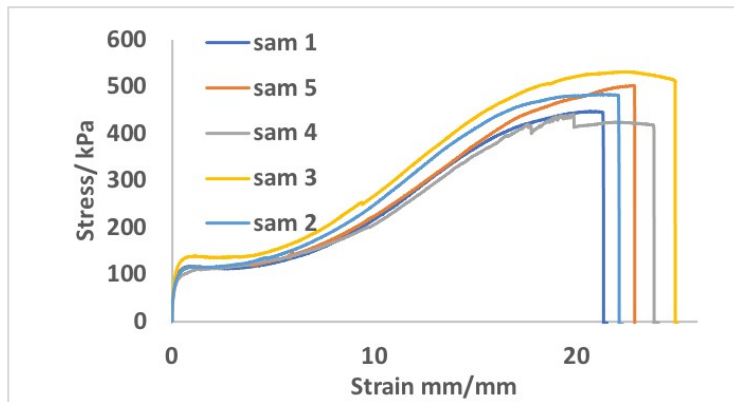

**Figure S4:** Stress-strain curves for the materials with HEA:BA (100:0) with TMSDA: EDDT as (1:1) (Formulation 7)

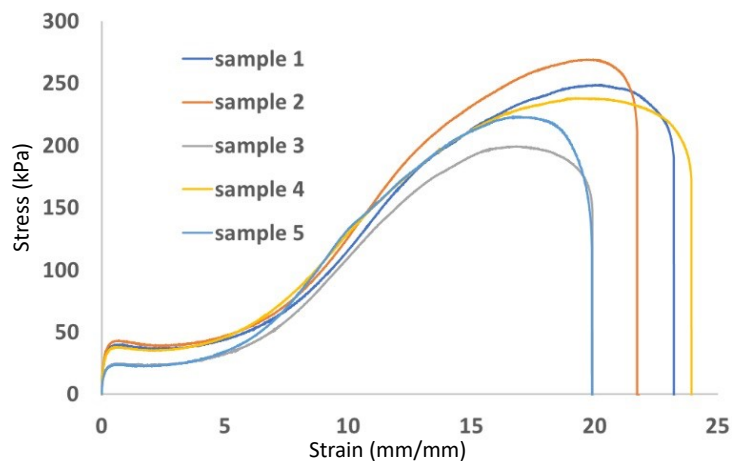

**Figure S5:** Stress-strain curves for the materials with HEA:BA (80:20) with TMSDA:EDDT (1:1) (Formulation 5)

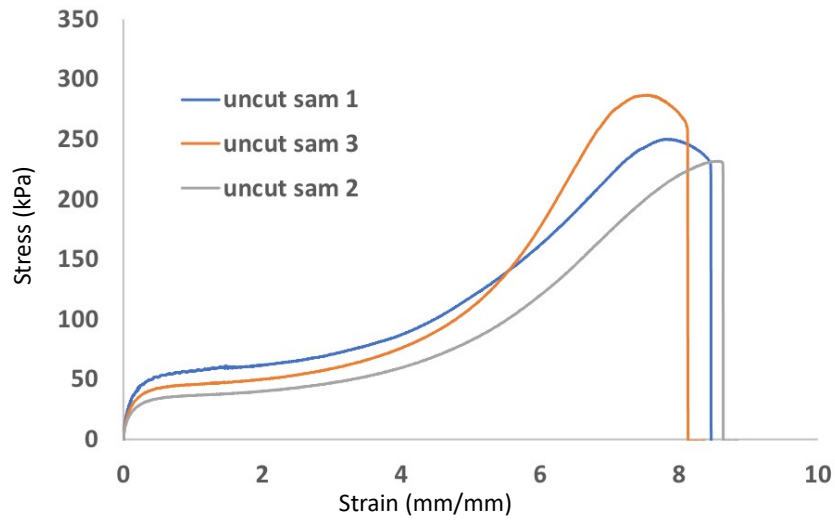

**Figure S6:** Stress-strain curves for the heated materials with HEA:BA (80:20) with TMSDA:EDDT (1:1) (Formulation 5)

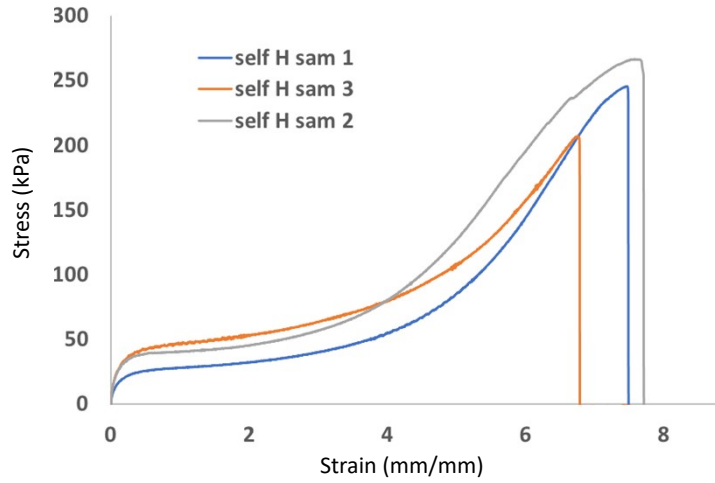

**Figure S7:** Stress-strain curves for the self-healed materials with HEA:BA (80:20) with TMSDA:EDDT (1:1) (Formulation 5)

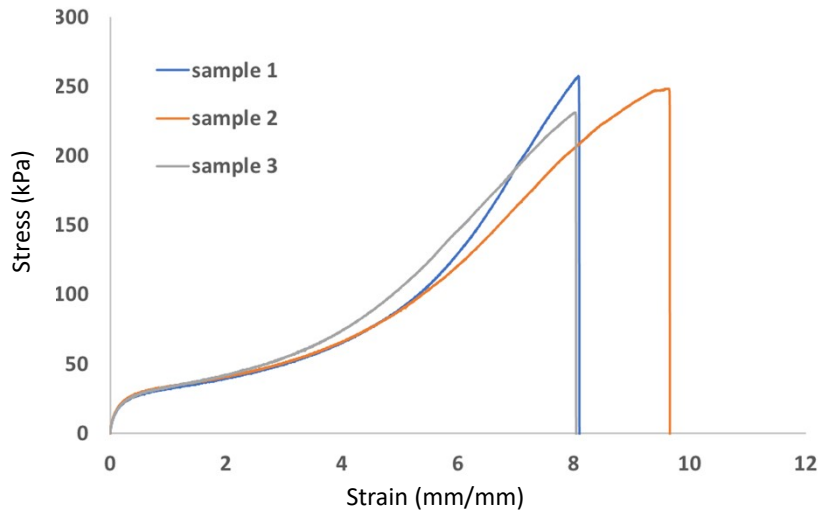

**Figure S8:** Stress-strain curves for the materials with HEA:BA (80:20) with TMSDA:EDDT (1:0.75) (Formulation 4)

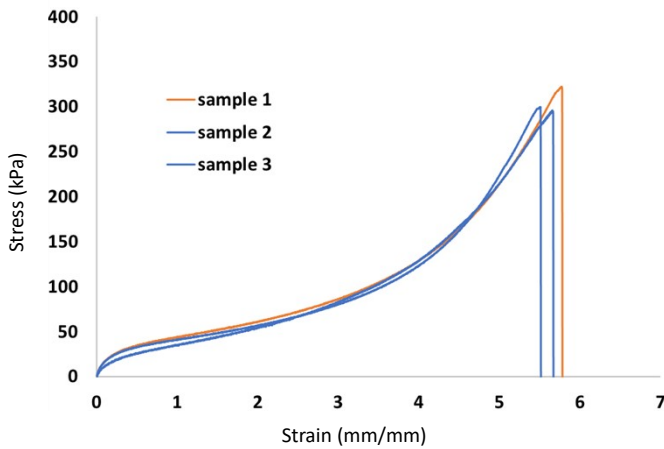

**Figure S9:** Stress-strain curves for the heated materials with HEA:BA (80:20) with TMSDA:EDDT (1:0.75) (Formulation 4)

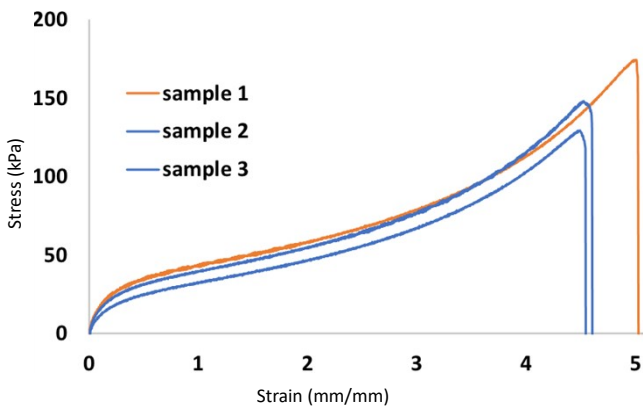

**Figure S10:** Stress-strain curves for the self-healed materials with HEA:BA (80:20) with TMSDA:EDDT (1:0.75) (Formulation 4)

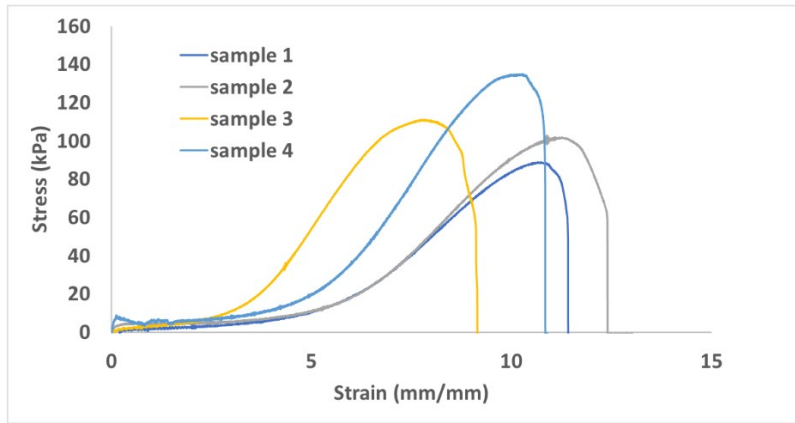

**Figure S11:** Stress-strain curves for the materials with HEA:BA (50:50) with TMSDA:EDDT (1:1) (Formulation 2)

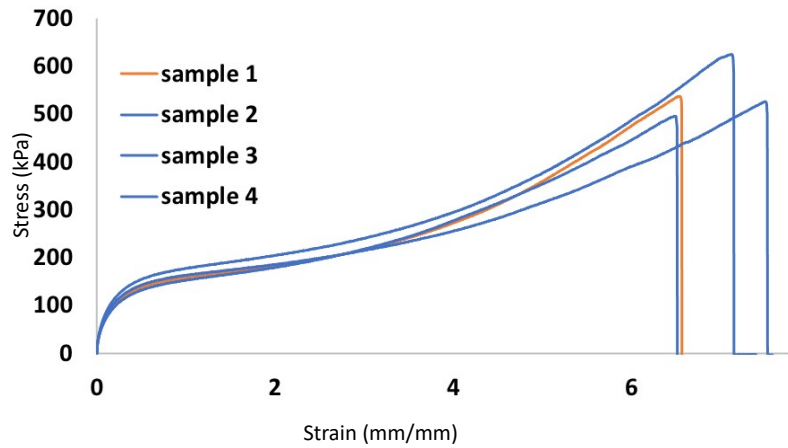

**Figure S12:** Stress-strain curves for the heated materials with HEA:BA (100:0) with TMSDA:EDDT (1:0.75) (Formulation 6)

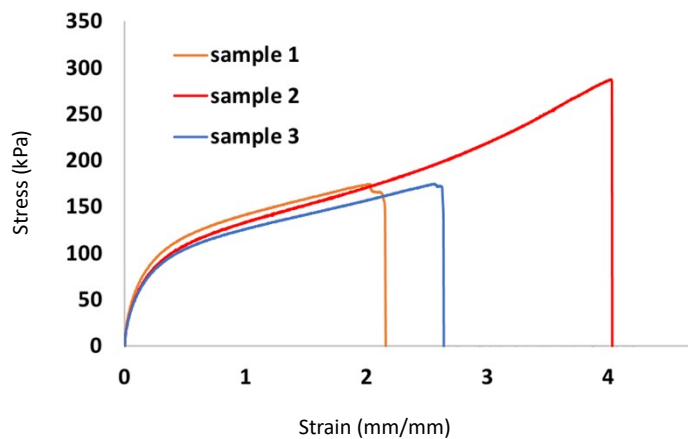

**Figure S13:** Stress-strain curves for the self-healed materials with HEA:BA (100:0) with TMSDA:EDDT (1:0.75) (Formulation 6)

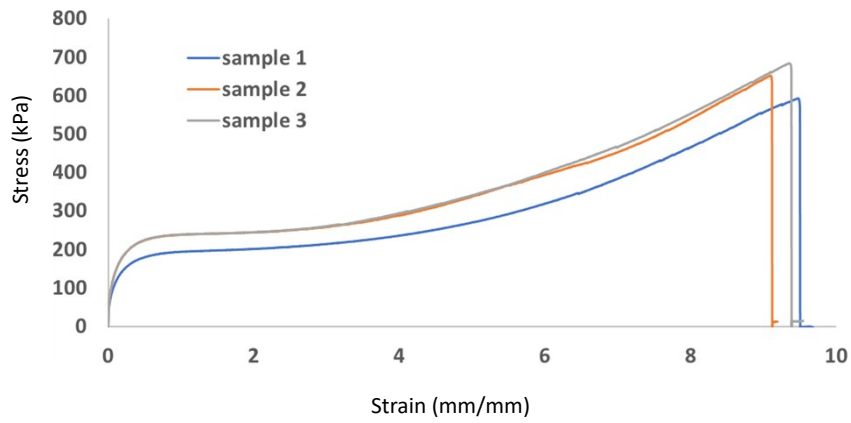

**Figure S14:** Stress-strain curves for the heated materials with HEA:BA (100:0) with TMSDA:EDDT (1:1) (Formulation 7)

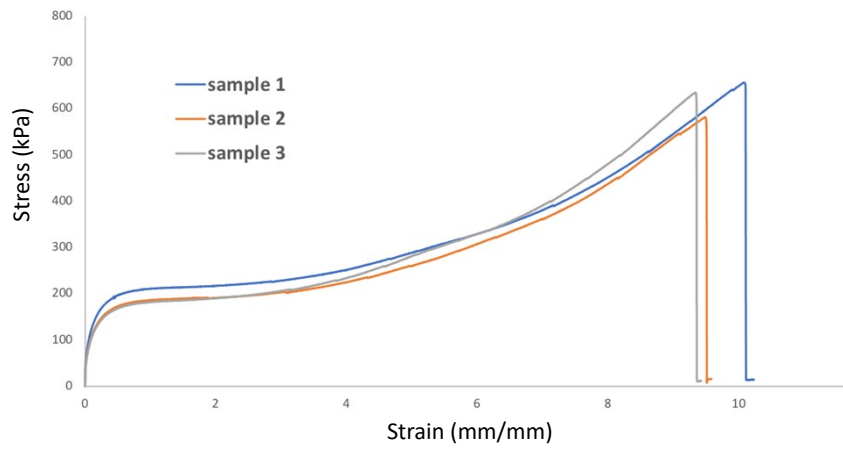

**Figure S15:** Stress-strain curves for the self-healed materials with HEA:BA (100:0) with TMSDA:EDDT (1:1) (Formulation 7)

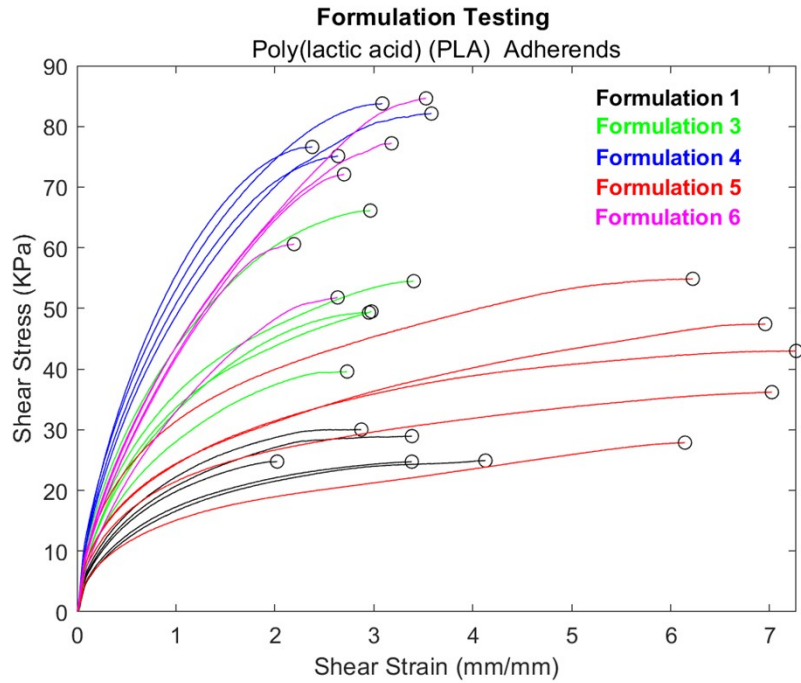

**Figure S16:** Stress-strain curves for various formulations in lap shear, with 3D-printed PLA as the lap adherend

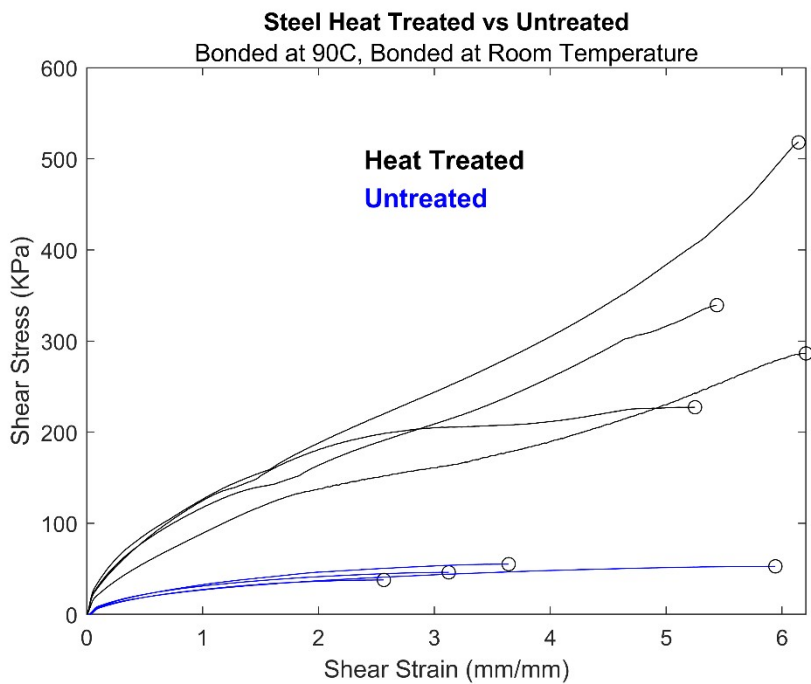

**Figure S17:** Stress-strain curves for Formulation 4, TMSDA:EDDT (1:0.75) with HEA:BA (80:20), bonded at room temperature and bonded at 90 °C for 16 hours.

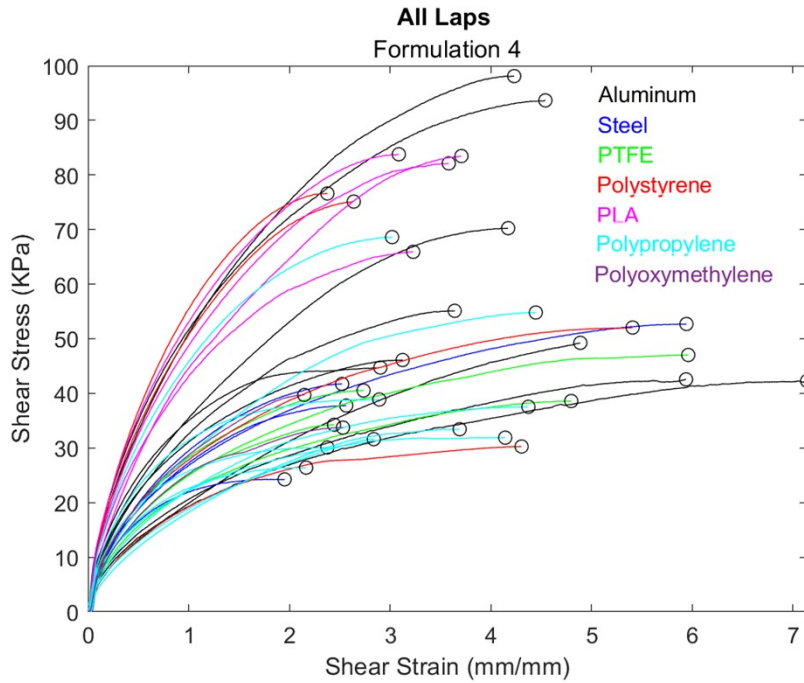

**Figure S18:** Stress-strain curves for Formulation 4, TMSDA:EDDT (1:0.75) with HEA:BA (80:20), against various lap adherend materials.

**Table S1:** Percent Method of Failure for different formulations on 3D printed PLA laps

| Formulation | Adhesive | Cohesive | Inconclusive* |
|-------------|----------|----------|---------------|
| 1           | 100%     |          |               |
| 3           | 100%     |          |               |
| 4           | 50%      | 25%      | 25%           |
| 5           |          | 80%      | 20%           |
| 6           | 100%     |          |               |

\*Inconclusive indicated the tester either did not record or could not conclude a failure method (i.e. failure method was not visible / could not be determined, or failure occurred both cohesively and adhesively)
